# Supplementary material for: Synergistic effects of dopant (Ti or Sn) and oxygen vacancy on the electronic properties of hematite: a DFT investigation
Source: Royal Society of Chemistry journal article supplement (doi:10.1039/d0ra01450h), 2020-01-01
Supplement: d0ra01450h1.pdf [file d0ra01450h1.pdf]

## Supplementary Information

### **Synergistic Effects of dopant (Ti or Sn) and Oxygen Vacancy on the Electronic Properties of Hematite: a DFT Investigation †**

Haijun Pan,<sup>\*ab</sup> Dongbiao Ao,<sup>a</sup> and Gaowu Qin<sup>c</sup>

*a. School of Resources and Materials, Northeastern University at Qinhuangdao, Qinhuangdao 066004, People's Republic of China E-mail:panhaijun@neuq.edu.cn*

*b. Hebei Provincial Laboratory for Dielectric and Electrolyte Functional Materials, Qinhuangdao 066004, People's Republic of China*

*c. Key Laboratory for Anisotropy and Texture of Materials, Northeastern University, Shenyang 110819, People's Republic of China*

Hematite has been widely studied as one of the most promising photoanodes in photoelectrochemical decomposition of water. At present, a prevailing strategy of coupling dopant (Ti or Sn) and oxygen vacancy has been proposed by experiments, which effectively improves its photocatalytic activity. In order to clarify the intrinsic reasons for the improvement of photochemistry activity, the density functional theory is adopted to calculate the formation mechanism and electronic properties of hematite with doping ion and oxygen vacancy. The result shows that the doped atom is beneficial to the formation of oxygen vacancy in hematite, thus forming a stable structure containing doping ion and oxygen vacancy. Due to the synergistic effects of dopant and oxygen vacancy, the bandgap of hematite decreases, and donor levels are introduced into the bandgap, which lead to the increase of carrier concentration. In the system with doped Ti and oxygen vacancy, donor levels are introduced at 1.47 eV and 1.73 eV under the bottom of the conduction band, respectively. For the case containing Sn and oxygen vacancy, the donor level is introduced at 1.75 eV from the conduction band minimum. Our results elaborate the reasons for the enhancement of carrier densities in terms of electronic structure, and provide some guidance for the future modification of photocatalyst.

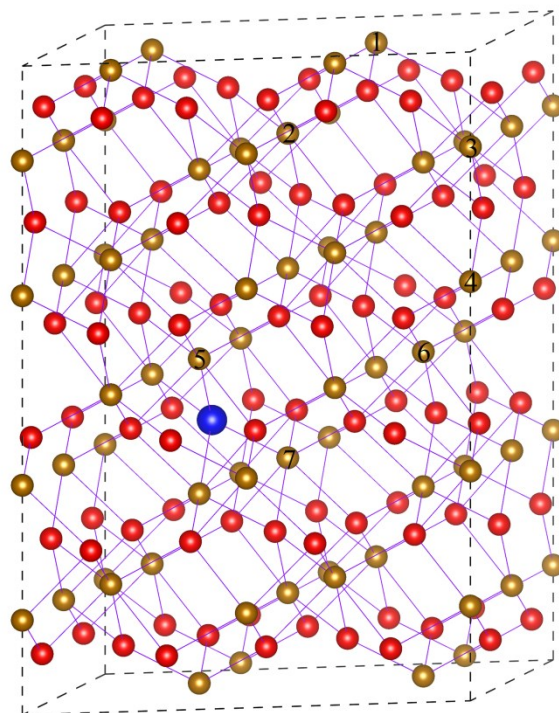

Fig. S1 Possible combination of  $V_O$  and dopant atom (Ti or Sn) in  $2 \times 2 \times 1$  supercell of  $Fe_2O_3$ . The Fe atom and O atom are represented by golden yellow and red spheres, respectively.  $V_O$  is represented by blue sphere. In each model, the  $V_O$  is fixed, while the introduced dopant is placed at different positions marked by numbers.

Table S1 The total energy of the  $2 \times 2 \times 1$  supercell of  $Fe_2O_3$  with  $V_O$  and Ti at different position.

| Models  | Position of Ti atom | Total energy (eV) |
|---------|---------------------|-------------------|
| Model 1 | 1                   | -819.7313         |
| Model 2 | 2                   | -819.8584         |
| Model 3 | 3                   | -819.7257         |
| Model 4 | 4                   | -819.7950         |
| Model 5 | 5                   | -818.0045         |
| Model 6 | 6                   | -820.0070         |
| Model 7 | 7                   | -819.5649         |

Table S2 The total energy of the  $2 \times 2 \times 1$  supercell of  $\text{Fe}_2\text{O}_3$  with  $\text{V}_\text{O}$  and Sn at different position.

| Models  | Position of Ti atom | Total energy (eV) |
|---------|---------------------|-------------------|
| Model 1 | 1                   | -811.5719         |
| Model 2 | 2                   | -811.6007         |
| Model 3 | 3                   | -811.5736         |
| Model 4 | 4                   | -811.6730         |
| Model 5 | 5                   | -810.0023         |
| Model 6 | 6                   | -811.8476         |
| Model 7 | 7                   | -810.1797         |

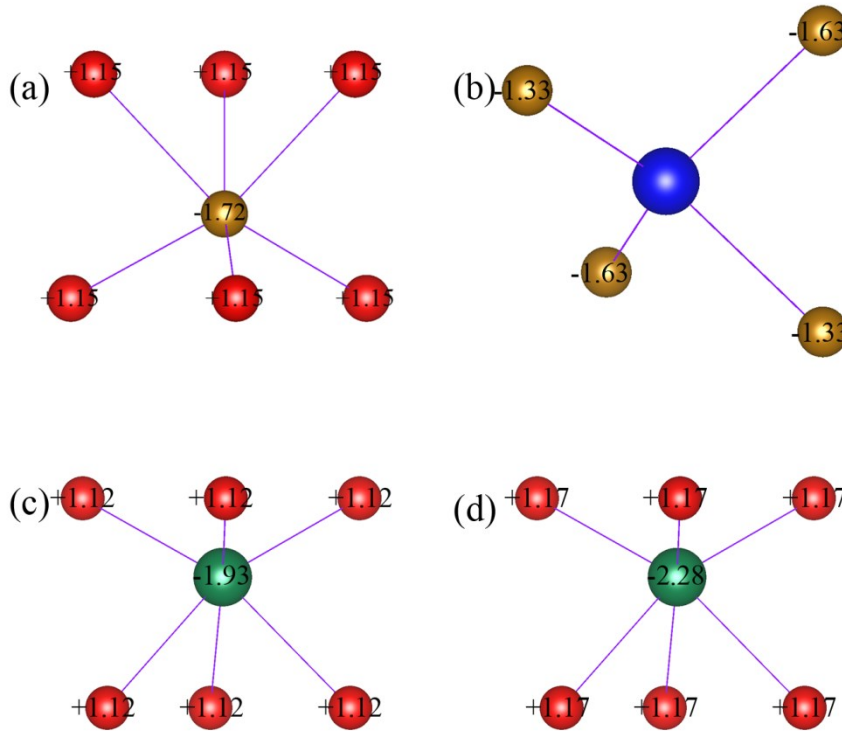

Fig. S2 The charge transfer between atoms in  $\text{Fe}_2\text{O}_3$ : (a) perfect crystal, (b) containing  $\text{V}_\text{O}$ , (c) containing Ti and (d) containing Sn. The positive sign represents the charge obtained by an atom relative to a neutral atom, while a negative sign represents the loss of charge.

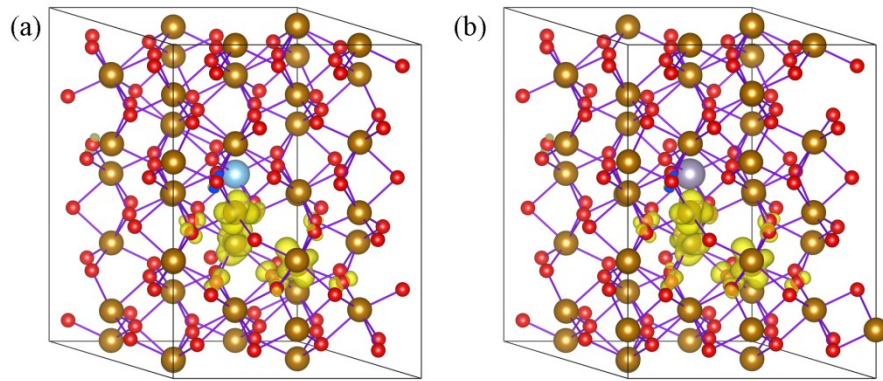

Fig. S3 The partial charge density of donor state of (a)  $(\text{Ti}_{\text{Fe}}+\text{V}_{\text{O}})\text{-Fe}_2\text{O}_3$  (b)  $(\text{Sn}_{\text{Fe}}+\text{V}_{\text{O}})\text{-Fe}_2\text{O}_3$ .
